# Supplementary material for: Doping Nafion® matrix by p-aramid flakes for a proton transport less reliant on moisture
Source: Royal Society of Chemistry journal article supplement (doi:10.1039/c1jm12057c), 2011-01-01
Supplement: c1jm12057c.pdf [file c1jm12057c.pdf]

## **Supporting information**

### **Doping Nafion<sup>®</sup> Matrix by *p*-Aramid Flakes for a Proton Transport Less Reliant on Moisture**

Bing Guo<sup>1</sup>, Zhaolin Liu<sup>2</sup>, Liang Hong<sup>1,2\*</sup>

<sup>1</sup>Department of Chemical & Biomolecular Engineering, National University of Singapore, 10 Kent Ridge Crescent, Singapore 119260, Singapore

<sup>2</sup> Institute of Materials Research and Engineering, 3 Research Link, Singapore 117602, Singapore

S-Figure 1. The plot of  $\ln(\eta_{\text{rel}})/c$  vs  $c$  for polymer P105 in concentrated sulfuric acid.  $\eta_{\text{rel}}$  is the relative viscosity and  $c$  is the concentration of polymer (g/l)

S-Figure 2. The comparison of proton conductivities for different composite membranes in water.

S-Figure 3. The FE-SEM images of the three PPTA samples that were synthesized by using different PPD:TA ratios as labelled in the micrographs.

S-Figure 4. Microstructure of the commercial N112 membrane.

S-Figure 5. <sup>19</sup>F-NMR spectra of Nafion (a) and Nafion-2%P105 (b).

S-Figure 6. Changes in the reduced viscosity ( $\eta_{\text{red}}$ ) of the colloidal suspensions consisting of Nafion, P105 (wt.% based on Nafion) and IPA/H<sub>2</sub>O solvent (v/v=7/5, pH=3) with the increase in concentration of Nafion.

S-Figure 7. Dynamic light scattering test that shows the sizes of Nafion-P105 clusters in IPA/H<sub>2</sub>O (7/5) medium.

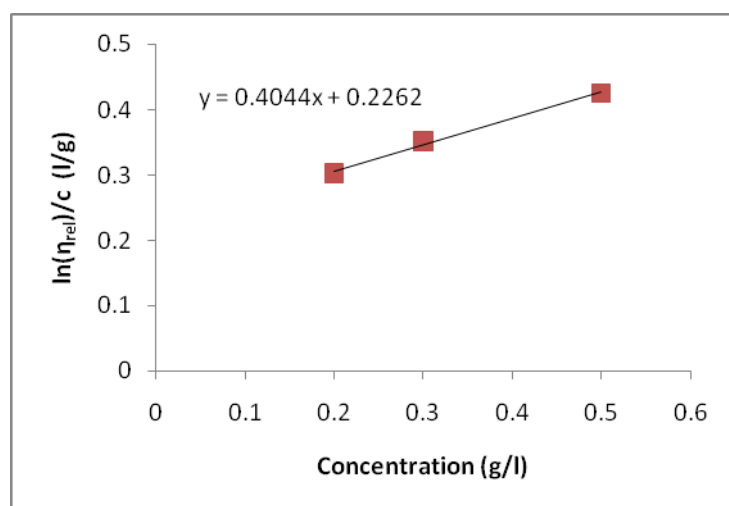

S-Fig. 1: The plot of  $\ln(\eta_{rel})/c$  vs  $c$  for polymer P105 in concentrated sulfuric acid.  $\eta_{rel}$  is the relative viscosity and  $c$  is the concentration of polymer (g/l)

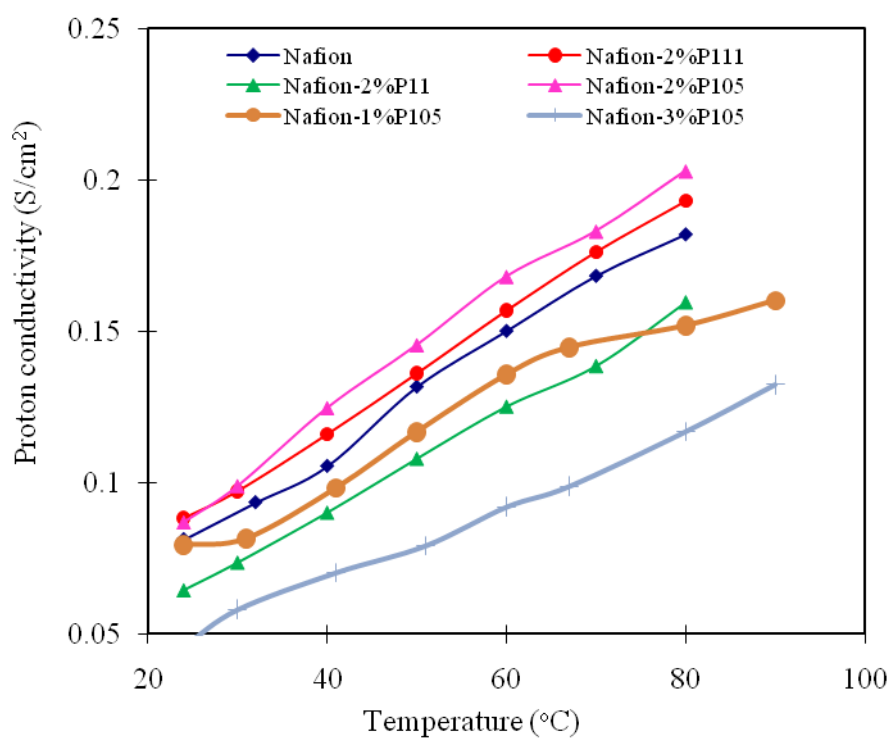

S-Fig. 2. The comparison of proton conductivities for different composite membranes in water.

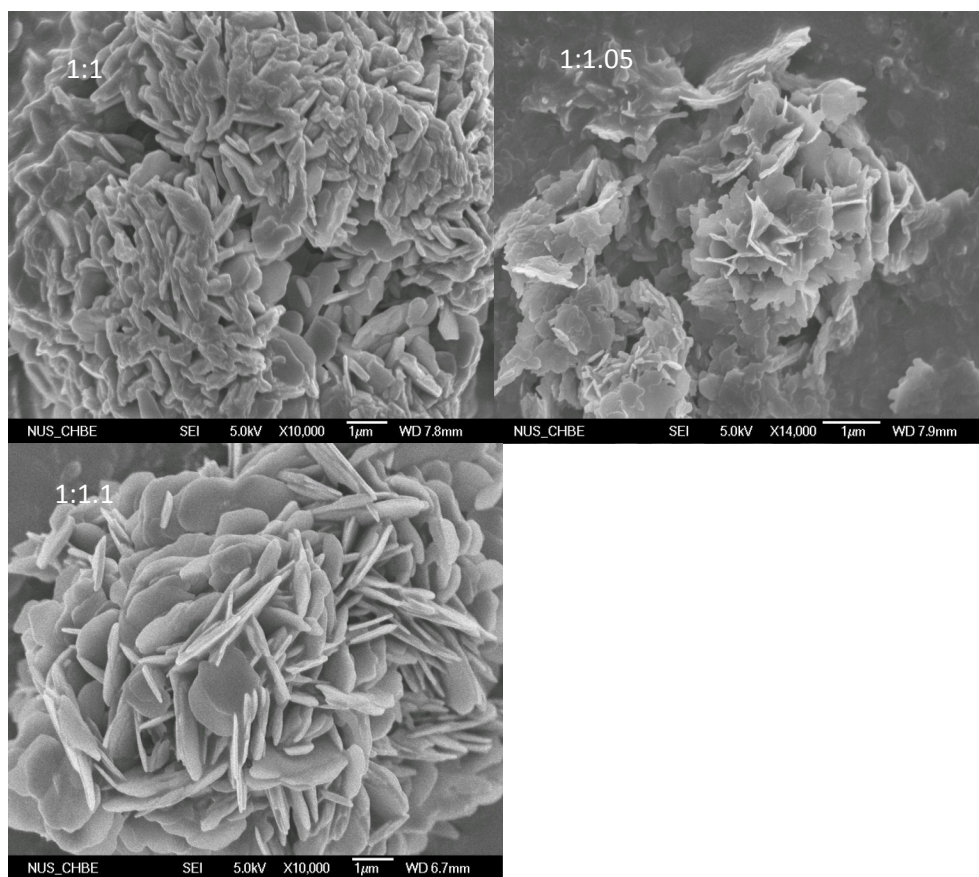

S-Fig 3. The FE-SEM images of the three PPTA samples that were synthesized by using different PPD:TA ratios as labelled in the micrographs.

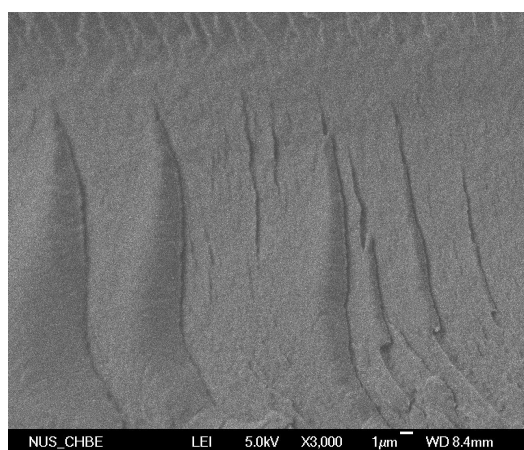

S-Fig.4. Microstructure of the commercial N112 membrane.

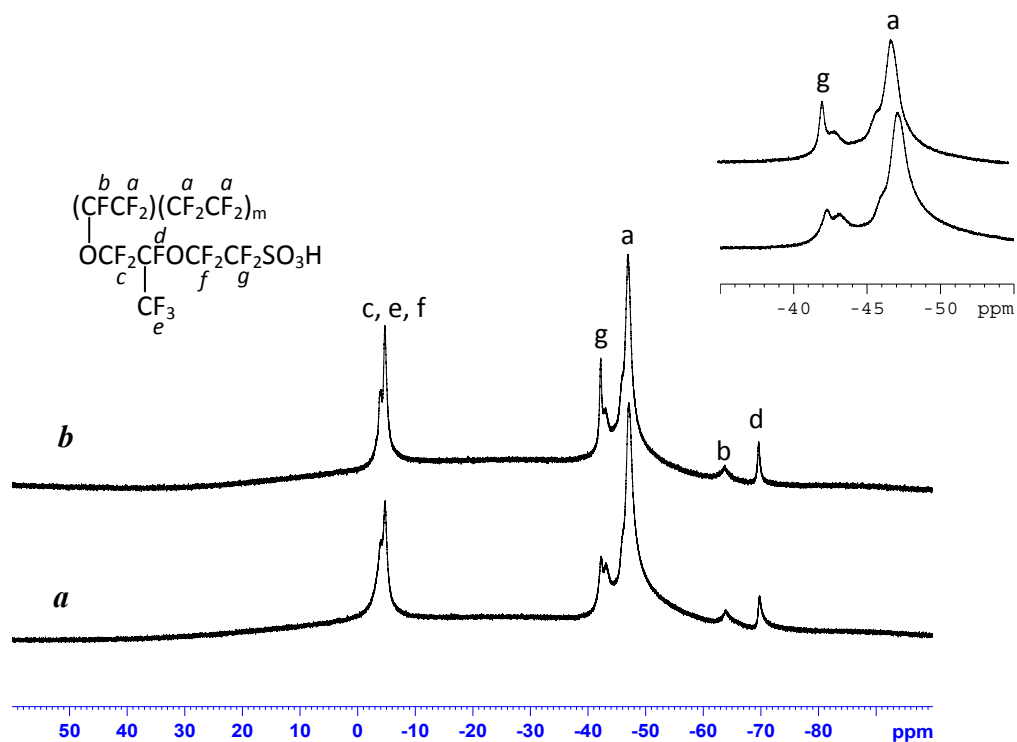

S-Fig. 5.  $^{19}\text{F}$ -NMR spectra of Nafion (a) and Nafion-2%P105 (b).

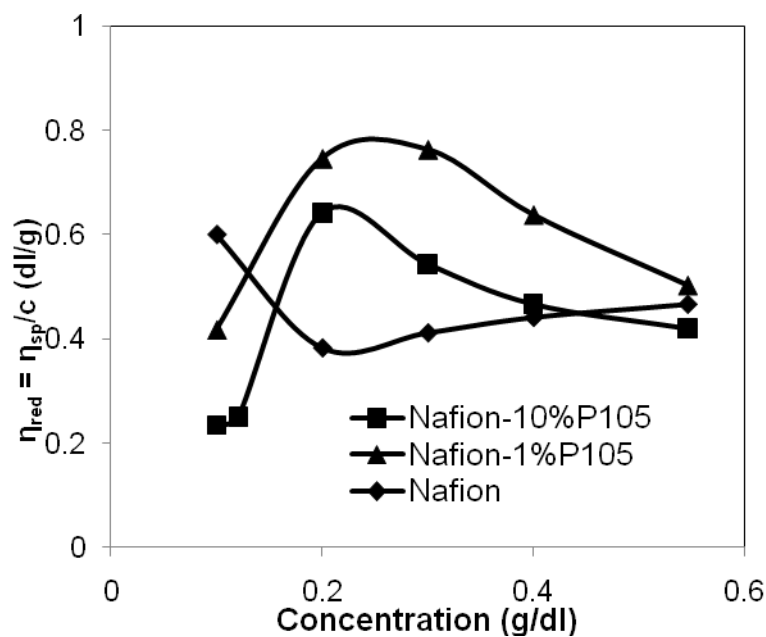

S-Fig. 6. Changes in the reduced viscosity ( $\eta_{\text{red}}$ ) of the colloidal suspensions consisting of Nafion, P105 (wt.% based on Nafion) and IPA/H<sub>2</sub>O solvent (v/v=7/5, pH=3) with the increase in concentration of Nafion.

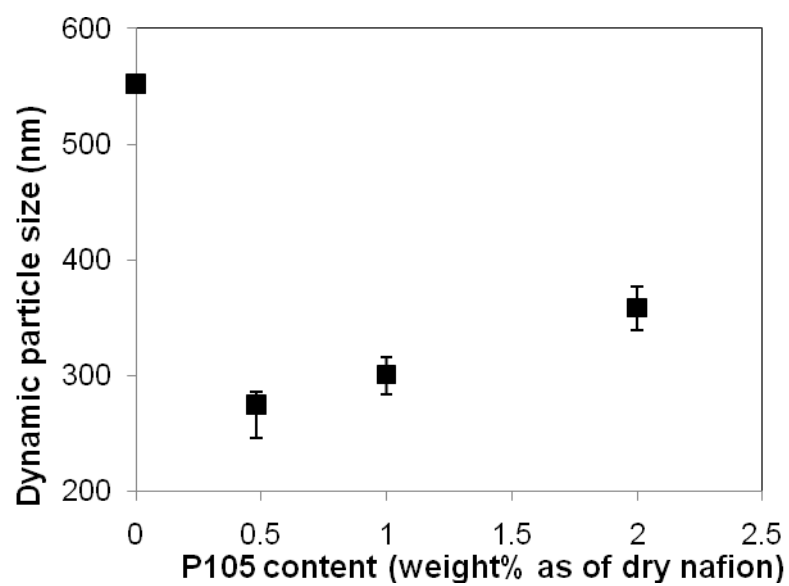

S-Fig. 7. Dynamic light scattering test that shows the sizes of Nafion-P105 clusters in IPA/H<sub>2</sub>O (7/5) medium.
